# Supplementary material for: Sequence stratigraphy of the Middle Jurassic Yan’an Formation (NE Ordos Basin, China), relationship with climate conditions and basin evolution, and coal maceral’s characteristics
Source: Frontiers journal article supplement (doi:10.3389/feart.2022.1086298), 2023-01-25
Supplement: Data_Sheet_1.doc [file Data_Sheet_1.doc]

**Supplementary material**

Due to the limitation of the length of the article, the related Figures of the research background in the manuscript are shown here, including Figs. S1, S2, and S3. Here, Fig. S1 includes some characteristic aspects of the investigated succession of the Yan'an Formation. (A) Fining-upward graded bedding in a quartzose sandy conglomerate (Gp), (B) Rooted clay, (C) Thin (30 cm) coal bed, and (D) Plant fossils from a coaly mudstone layer; Fig. S2 includes lithofacies association FA1 and FA2, representing a meandering river and a lacustrine delta, respectively; Fig S3 includes sequence boundaries and system tract boundaries of the Yan'an Formation.


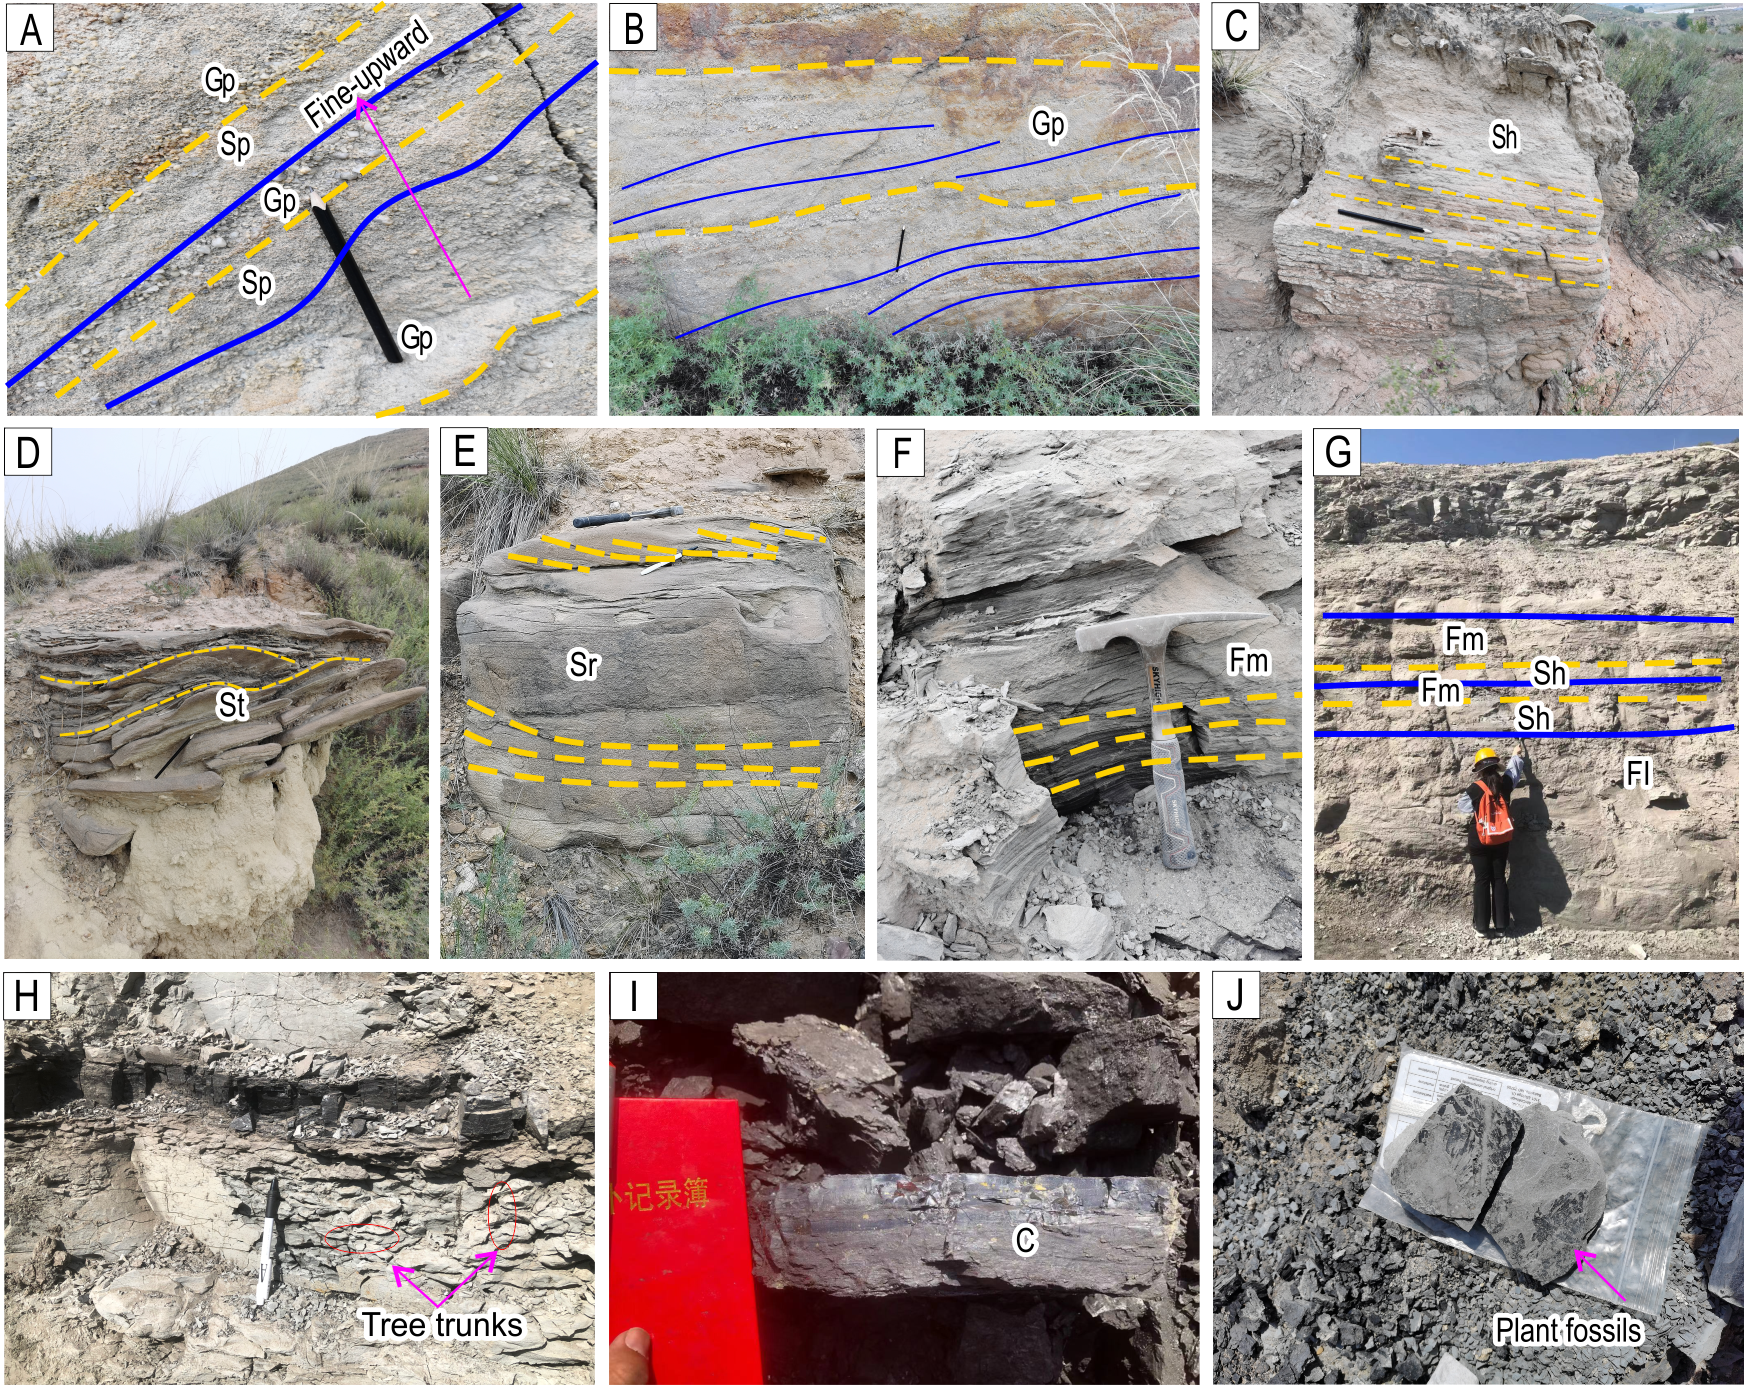


**Fig. S1.** Some characteristic aspects of the investigated succession of the Yan'an Formation. (A) Fining-upward graded bedding in a quartzose sandy conglomerate (Gp). (B) Rooted clay. (c) Thin (30 cm) coal bed. (C) Plant fossils from a coaly mudstone layer.


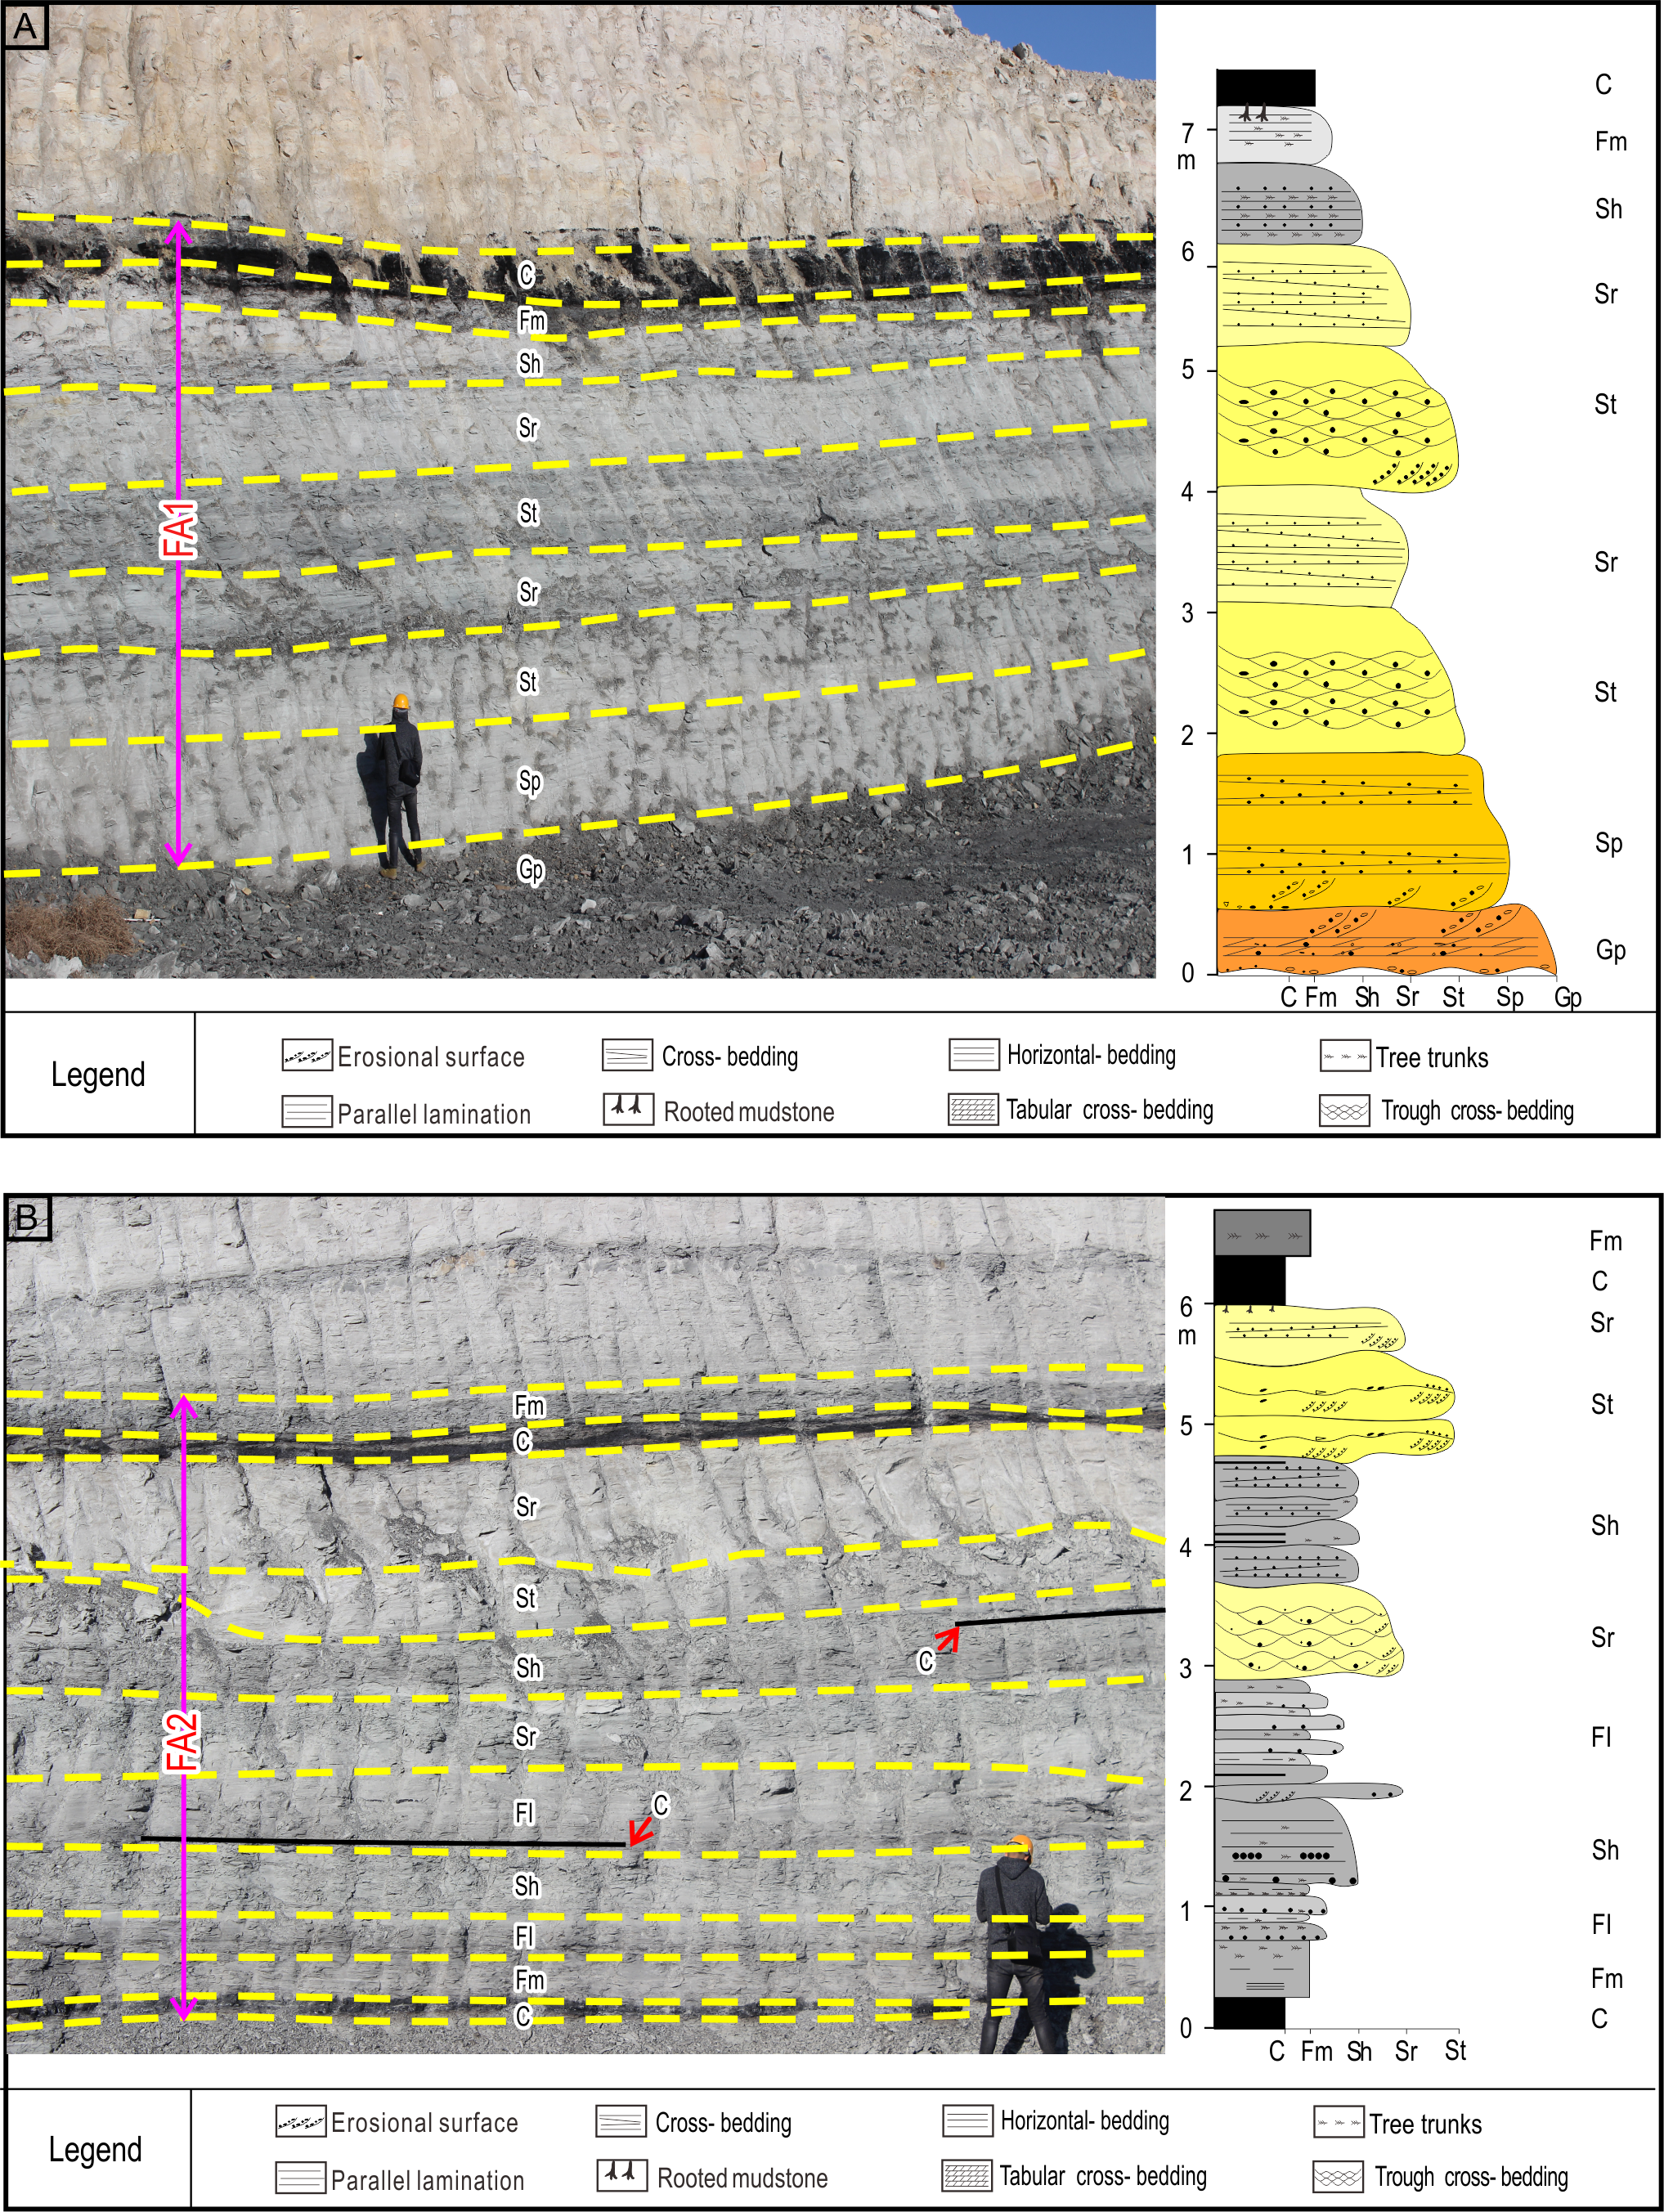


**Fig. S2.** Lithofacies association FA1 and FA2, representing a meandering river and a lacustrine delta, respectively. (A) Succession with schematic interpretation in the Gaoxigou Mine, showing the FA1. (B) Succession with schematic interpretation in the Nayuan Mine, showing the FA2


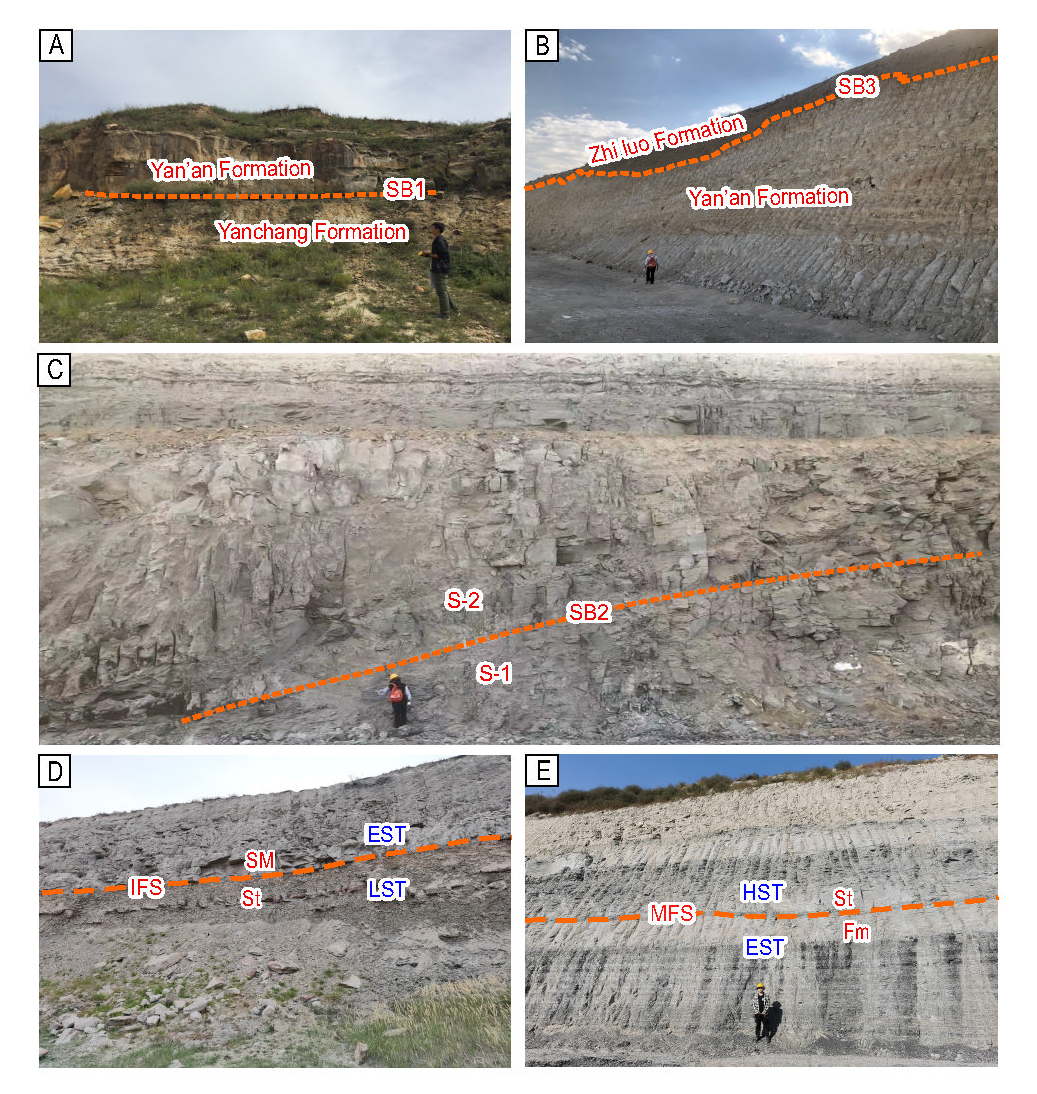


**Fig. S3.** Sequence boundaries and system tract boundaries of the Yan’an Formation. (A) Sequence boundary SB1 at the boundary between the top of the Yanchang Fm. and the base of the Yan’an Fm. (B) Sequence boundary SB3 at the boundary between the top of the Yan’an Fm. and the base of the Zhiluo Fm. (C) Sequence boundary SB2 within the Yan’an Fm., separating the fluvial sediments from the lacustrine succession. (D) Initial lake flooding surface (IFS). Deposits of facies St in an incised valley formed by a meandering river are present under the IFS, whereas deposits of facies SM, reflecting the beginning of the lacustrine transgression over a lacustrine deltaic plain, are present on top of the IFS. (E) Maximum lake flooding surface (MFS). Deposits of facies Fm, which reflect the lacustrine delta front, are situated below the MFS, whereas and deposits of facies, representing the regression, were deposited on the lacustrine deltaic plain, above the MFS.
